# Supplementary material for: A Case Study Demonstrates That the Litter of the Rare Species Cinnamomum migao Composed of Different Tissues Can Affect the Chemical Properties and Microbial Community Diversity in Topsoil
Source: MDPI journal article supplement (doi:10.3390/microorganisms10061125), 2022-05-30
Supplement: s1 [file s1]

**Table S1** The initial chemical composition of the topsoil.

| pH value | TN<br>mg·kg <sup>-1</sup> | TP<br>g·kg <sup>-1</sup> | TK<br>g·kg <sup>-1</sup> | AN<br>g·kg <sup>-1</sup> | AP<br>mg·kg <sup>-1</sup> | AK<br>mg·kg <sup>-1</sup> | Catalase<br>mL·g <sup>-1</sup> ·20min | Urease<br>mgNH <sub>3</sub> -N/g | Phophatase<br>umol·g <sup>-1</sup> ·d <sup>-1</sup> | Invertase<br>mg·g <sup>-1</sup> ·d <sup>-1</sup> |
|----------|---------------------------|--------------------------|--------------------------|--------------------------|---------------------------|---------------------------|---------------------------------------|----------------------------------|-----------------------------------------------------|--------------------------------------------------|
| 6.06±0.1 | 0.1±0.032                 | 0.2±0.032                | 0.29±0.069               | 52.5±4.11                | 3.5±0.68                  | 13.03±1.02                | 1.43±0.034                            | 0.015±0.00                       | 23.53±2.98                                          | 1.51±0.66                                        |

In one-way ANOVA of all samples, Turkey was used to compare the multiple means ( $P < 0.05$ ), which was significant difference; there was no significant difference when the same letter was used, and there was significant difference between different letters.



**Table S2 topological composition characteristics of network structure**

| different treat | Number of nodes |          | Number of edges |          | Number of neighbors |          | Characteristic path length |          | Clustering coefficient |          | Network density |          |
|-----------------|-----------------|----------|-----------------|----------|---------------------|----------|----------------------------|----------|------------------------|----------|-----------------|----------|
|                 | fungus          | bacteria | fungus          | bacteria | fungus              | bacteria | fungus                     | bacteria | fungus                 | bacteria | fungus          | bacteria |
| control         | 222             | 911      | 6759            | 50233    | 58.89               | 110.28   | 1.60                       | 1.84     | 0.49                   | 0.49     | 0.13            | 0.08     |
| leaf            | 246             | 316      | 3031            | 6514     | 22.64               | 39.22    | 1.86                       | 1.84     | 0.48                   | 0.48     | 0.49            | 0.08     |
| branch          | 246             | 306      | 3031            | 4056     | 22.64               | 30.20    | 1.86                       | 1.79     | 0.49                   | 0.48     | 0.05            | 0.05     |
| pericarp        | 308             | 1185     | 6556            | 76652    | 40.59               | 127.3    | 1.78                       | 1.86     | 0.50                   | 0.48     | 0.07            | 0.05     |
| seed            | 271             | 905      | 3788            | 42675    | 27.56               | 92.30    | 1.85                       | 1.87     | 0.49                   | 0.49     | 0.05            | 0.05     |

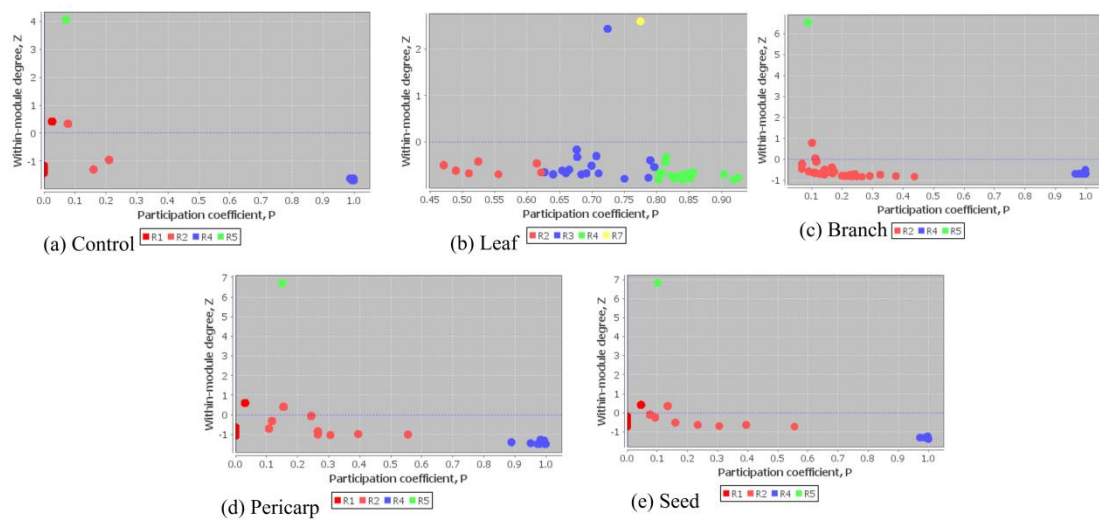

**Figure S2**  $Z_i$ - $P_i$  plot showing the distribution of OTUs based on their topological roles in networks fungi. Each symbol represented an OTU in the bacterial (filled circle) or fungal (empty circle) network.

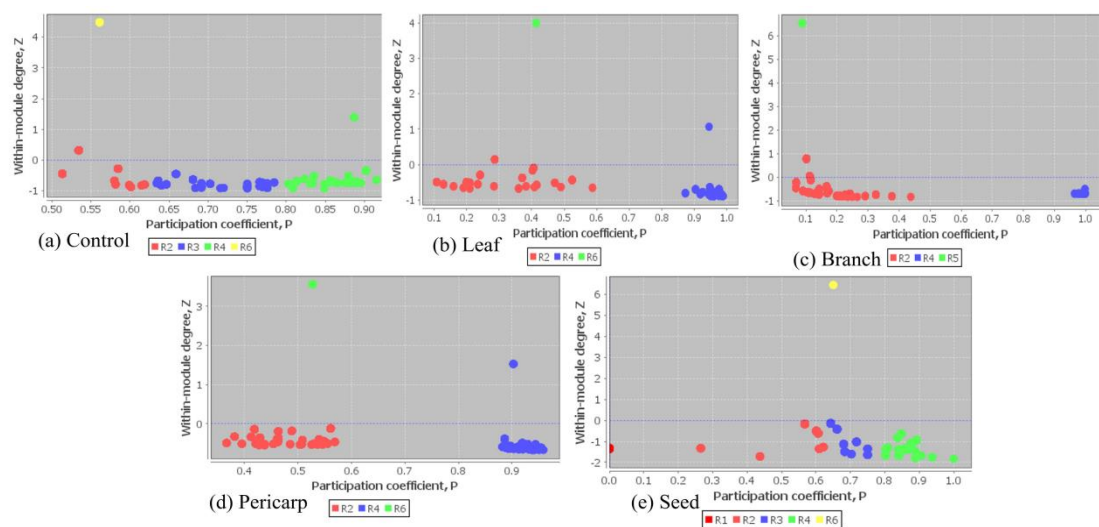

**Figure S3**  $Z_i$ - $P_i$  plot showing the distribution of OTUs based on their topological roles in networks bacteria: Each symbol represented an OTU in the bacterial (filled circle) or fungal (empty circle) network.
